1 **A Bispecific Antibody Targeting RBD and S2 Potently Neutralizes SARS-CoV-2**  
2 **Omicron and Other Variants of Concern**

3 Mengqi Yuan<sup>1</sup>, Xiangyu Chen<sup>2,3</sup>, Yanzhi Zhu<sup>4</sup>, Xiaoqing Dong<sup>1</sup>, Yan Liu<sup>5</sup>, Zhaohui  
4 Qian<sup>5,#</sup>, Lilin Ye<sup>6,#</sup>, Pinghuang Liu<sup>1,#</sup>

5  
6 <sup>1</sup> Key Laboratory of Animal Epidemiology of the Ministry of Agriculture, College of  
7 Veterinary Medicine, China Agricultural University, Beijing, 100193, China.

8 <sup>2</sup>School of Laboratory Medicine and Biotechnology, Southern Medical University,  
9 Guangzhou, Guangdong, China.

10 <sup>3</sup>Institute of Cancer, Xinqiao Hospital, Third Military Medical University, Chongqing,  
11 400038, China.

12 <sup>4</sup>College of Biological Sciences, China Agricultural University, Beijing, 100193, China.

13 <sup>5</sup>NHC Key laboratory of Systems Biology of Pathogens, Institute of Pathogen Biology,  
14 Chinese Academy of Medical Sciences and Peking Union Medical College, Beijing,  
15 100176, China,

16 <sup>6</sup>Institute of Immunology, PLA, Third Military Medical University, 400038,  
17 Chongqing, China.

18

19 **Running title:** Bi-Nab<sub>35B5-47D10</sub> neutralizes Omicron variants

20

21 **#Corresponding author:**

22 Zhaohui Qian, Ph.D., E-mail: [zqian2013@sina.com](mailto:zqian2013@sina.com)

23 Lilin Ye, Ph.D., E-mail: [yelilinlcmv@tmmu.edu.cn](mailto:yelilinlcmv@tmmu.edu.cn)

24 Pinghuang Liu, Ph.D., E-mail: [liupinghuang@cau.edu.cn](mailto:liupinghuang@cau.edu.cn)

25

26

27 **Abstract**

28 Emerging severe acute respiratory syndrome coronavirus type 2 (SARS-CoV-2)  
29 variants, especially the Omicron variant, have impaired the efficacy of existing  
30 vaccines and most therapeutic antibodies, highlighting the need for additional antibody-  
31 based tools that can efficiently neutralize emerging SARS-CoV-2 variants. The use of  
32 a “single” agent to simultaneously target multiple distinct epitopes on the spike is  
33 desirable to overcome the neutralizing escape of SARS-CoV-2 variants. Herein, we  
34 generated a human-derived IgG-like bispecific antibody (bsAb), Bi-Nab<sub>35B5-47D10</sub>,  
35 which successfully retained the specificity and simultaneously bound to the two distinct  
36 epitopes on RBD and S2. Bi-Nab<sub>35B5-47D10</sub> showed improved spike binding breadth  
37 among wild-type (WT) SARS-CoV-2, variants of concern (VOCs) and variants being  
38 monitored (VBM) compared with its parental mAbs. Furthermore, pseudotyped virus  
39 neutralization demonstrated that Bi-Nab<sub>35B5-47D10</sub> can efficiently neutralize VBMs  
40 including Alpha (B.1.1.7), Beta (B.1.351) and Kappa (B.1.617.1) and VOCs including  
41 Delta (B.1.617.2), Omicron BA.1 and Omicron BA.2. Crucially, Bi-Nab<sub>35B5-47D10</sub>  
42 substantially improved neutralizing activity against Omicron BA.1 (IC<sub>50</sub>= 27.3 ng/mL)  
43 and Omicron BA.2 (IC<sub>50</sub>= 121.1 ng/mL) compared with their parental mAbs. Therefore,  
44 Bi-Nab<sub>35B5-47D10</sub> represents a potential effective countermeasure against SARS-CoV-2  
45 Omicron and other variants of concern.

46

47

48

49

50

51

52

53

54

55 **Importance**

56       The new highly contagious SARS-CoV-2 Omicron variant caused substantial  
57 breakthrough infections and has become the dominant strain in countries across the  
58 world. Omicron variants usually bear high mutations in the spike protein and exhibit  
59 considerable escape of most potent neutralization monoclonal antibodies and reduced  
60 efficacy of current COVID-19 vaccines. The development of neutralizing antibodies  
61 with potent efficacy against the Omicron variant is still an urgent priority. Here, we  
62 generated a bsAb, Bi-Nab<sub>35B5-47D10</sub>, that simultaneously targets SARS-CoV-2 RBD and  
63 S2 and improved neutralizing potency and breadth against SARS-CoV-2 WT and the  
64 tested variants compared with their parental antibodies. Notably, Bi-Nab<sub>35B5-47D10</sub> has  
65 more potent neutralizing activity against the VOC Omicron pseudotyped virus.  
66 Therefore, Bi-Nab<sub>35B5-47D10</sub> is a feasible and potentially effective strategy to treat and  
67 prevent COVID-19.

68 **Keywords**

69       COVID-19, SARS-CoV-2, bispecific antibodies, neutralization, Omicron variant

70

71

72

73

74

75

76

## 77 **Introduction**

78 Owing to the continuous SARS-CoV-2 evolution caused by mutations and  
79 recombination, numerous genetically distinct SARS-CoV-2 lineages have emerged,  
80 and five major variants, including alpha (B.1.1.7), beta (B.1.351), gamma (P.1), delta  
81 (B.1.617.2), and the newly identified micron (B.1.1.1.529 and BA), have been designed  
82 sequentially based on criteria such as various transmissibility and the ability to escape  
83 immunity[1-6]. Most mutations of SARS-CoV-2 concern variants primarily clustered  
84 on the NTD and RBD, two regions of spike S1, the two major domains being targeted  
85 by neutralizing antibodies[5, 7-10]. Many of these mutations in S1 have been  
86 previously reported to undermine the effectiveness of COVID-19 vaccines and  
87 therapeutic neutralizing antibodies[11, 12]. The recently identified SARS-CoV-2  
88 Omicron variant of concern (VOC) worsened the situation[13]. The Omicron BA.1  
89 variant harbors an unusually high number of mutations and rapid spread capacity.  
90 Omicron BA.1 has over 30 mutations in the viral spike protein, including 15 mutations  
91 in RBD[14]. The Omicron variant has rapidly replaced the previously dominant Delta  
92 variant and has become the dominant circulating strain in many countries across the  
93 world since it was first reported in November 2021 in Botswana and South Africa[15,  
94 16]. The substantial mutations of the Omicron variant make it completely or partially  
95 resistant to neutralization by most potent monoclonal antibodies against other VOCs  
96 and result in significantly reduced efficacy of existing COVID-19 vaccines[17-20].  
97 Therefore, it is still a top priority to develop highly potent and broadly monospecific or  
98 multispecific neutralizing mAbs targeting SARS-CoV-2 heavily mutated variants, such  
99 as the Omicron variant[21].

100 Monoclonal antibody cocktails or bispecific antibodies are an effective strategy to  
101 counter the escape of highly mutated SARS-CoV-2 variants[22]. The bsAb strategy has  
102 been successfully applied to the treatment of cancer and inflammatory disorders and  
103 viral infectious diseases[23-26]. Bispecific antibodies are advantageous over antibody  
104 cocktails given the complicated formulation and cost of antibody cocktail strategies[27-

105 30]. The SARS-CoV-2 spike ectodomain is segregated into two units, termed S1 and  
106 S2. The S1 subunit of SARS-CoV-2 containing NTD and C-terminal RBD is  
107 responsible for cellular binding and is targeted by most neutralizing antibodies, whereas  
108 the S2 subunit is relatively more conserved and mediates membrane fusion[31, 32]. The  
109 S2 region, harboring neutralizing epitopes, is an alternative conserved target on the  
110 spike[33]. To avail the cellular binding and fusion of two key steps of SARS-CoV-2  
111 entry, we generated a human-derived, IgG1-like bispecific antibody Bi-Nab<sub>35B5-47D10</sub>  
112 based on two human neutralizing antibodies, 35B5 and 47D10, which target the spike  
113 RBD and S2 region, respectively. Human mAb 35B5 is a potent human monoclonal  
114 antibody panneutralizing against WT SARS-CoV-2 and VOCs, whereas 47D10 is an  
115 anti-S2 human neutralizing antibody with crossing activity against several beta  
116 coronaviruses. Our results show that Bi-Nab<sub>35B5-47D10</sub> neutralizing activities  
117 successfully maintained parental specificity and simultaneously targeted two epitopes  
118 of the RBD and S2 region, and the two arms of this bispecific antibody potently  
119 neutralized various circulating SARS-CoV-2 variants. Notably, it has improved  
120 neutralization activity against neutralizing relatively resistant SARS-CoV-2 Delta and  
121 Omicron BA.1 variants. These results indicate the potential development of therapeutic  
122 strategies of Bi-Nab<sub>35B5-47D10</sub> against SARS-CoV-2 Omicron and other variants.

## 123 **Results**

### 124 **Design and expression of bispecific antibodies.**

125 To obtain functional bsAbs, we designed and generated bsAbs containing tandem  
126 single-chain variable fragment (ScFv) domains of two potent neutralizing mAbs (35B5  
127 and 47D10) with G4S linker separation based on structural information and  
128 computational simulations of spike trimers as previously described [34]. We selected  
129 35B5 and 47D10 as two neutralizing antibodies given that their epitopes are located in  
130 different regions of the spike and lack an unfavorable steric clash. The 35B5 mAb is a  
131 new class RBD-targeting potent neutralizing human antibody through a distinctive  
132 spike glycan-displacement mechanism, and its epitope is invariant among SARS-CoV-  
133 2 wild-type and circulating variants [35, 36]. The 47D10 mAb, isolated from WT

134 SARS-CoV-2-infected patients' memory B cells, was identified as a SARS-CoV-2 S2-  
135 specific mAb (Fig. S1A and B). Based on 35B5 and 47D10, we designed two molecular  
136 topologies of bsAbs: 35B5<sub>VL-VH</sub> → G4S linker → 47D10<sub>VL-VH</sub> (Fig. 1A) and 47D10<sub>VL-</sub>  
137 <sub>VH</sub> → G4S linker → 35B5<sub>VL-VH</sub> (Fig. B). To prevent possible steric resistance caused  
138 by the SARS-CoV-2 spike trimer, the empirical choice of 5X G4S linkers was made.  
139 To maintain the antibody Fc-mediated activities, the individual 35B5 and 47D10 ScFvs  
140 were then connected using 5X G4S linkers and fused to the IgG1 Fc to generate the  
141 IgG-like bsAbs molecule (Fig. 1C). Two bsAbs, Bi-Nab<sub>47D10-35B5</sub> and Bi-Nab<sub>35B5-47D10</sub>,  
142 were produced by using the ExpiCHO™ Expression System and purified by affinity  
143 chromatography.

144 To evaluate the biological activity of Bi-Nab<sub>47D10-35B5</sub> and Bi-Nab<sub>35B5-47D10</sub>, we  
145 initially verified whether they were correctly folded soluble proteins by reducing and  
146 nonreducing SDS-PAGE (Fig. 1D and E). As expected, both Bi-Nab<sub>47D10-35B5</sub> and Bi-  
147 Nab<sub>35B5-47D10</sub> ran as homogeneous species at the expected molecular weight: monomer  
148 90 kD in the reducing SDS-PAGE gel and dimer 180 kD in the nonreducing SDS-  
149 PAGE gel (Fig. 1D and E). The results indicate that eukaryotically expressed bsAbs  
150 fold correctly.

### 151 **Binding and inhibiting properties of bsAbs.**

152 Next, to validate the simultaneous spike engagement of the two arms of the bsAbs,  
153 we performed an indirect ELISA binding assay. The equal concentrations of S1 protein  
154 and S2 protein of the WT SARS-CoV-2 strain were used as the coating antigens (Fig.  
155 2A-B). Bi-Nab<sub>35B5-47D10</sub> showed the best binding ability to the WT SARS-CoV-2 S1,  
156 with the lowest concentration for 50% of maximal effect (EC<sub>50</sub>) values of 4.2 ng/ml  
157 (Fig. 2A and 2E). Both Bi-Nab<sub>35B5-47D10</sub> and Bi-Nab<sub>47D10-35B5</sub> display similar affinity to  
158 the S2 protein, although a reduced affinity of bsAbs to the S2 protein compared with  
159 the parental mAb 47D10 was observed (Fig. 2B). These findings confirm that Bi-  
160 Nab<sub>47D10-35B5</sub> and Bi-Nab<sub>35B5-47D10</sub> can simultaneously bind both the RBD and the S2  
161 epitopes, demonstrating that both arms of the bsAbs are functional. Simultaneously, we  
162 assessed the potential of bsAbs to block the binding of angiotensin-converting enzyme  
163 2 (ACE2) to the WT SARS-CoV-2 RBD using ELISA-based binding inhibition assays

164 as previously described [37]. Consistent with the binding results of bsAbs to WT S1,  
165 the Bi-Nab<sub>35B5-47D10</sub> exhibited a similar potent blocking interaction between RBD and  
166 ACE2 as parental 35B5 and is superior to Bi-Nab<sub>47D10-35D5</sub> (Fig. 2C). Furthermore, Bi-  
167 Nab<sub>35B5-47D10</sub> also substantially bound to the mutated S1 proteins of SARS-CoV-2  
168 VOCs, which included HV69-70 deletion and N501Y and D614G mutations, and  
169 harbored a similar binding capacity to the VOC S1 with parental 35B5 (Fig. 2D). Indeed,  
170 Bi-Nab<sub>35B5-47D10</sub> demonstrated activity equal to, or in some cases better than, that of  
171 parental mAbs (Fig. 2E). These results indicate that Bi-Nab<sub>35B5-47D10</sub> retains the binding  
172 capacity and breadth of its parental mAbs.

### 173 **Crossing activity of bsAbs on SARS-CoV-2 VOCs and VBM S proteins.**

174 Next, we further investigated whether bsAbs could recognize different  
175 coronavirus S proteins in the native conformation. Human embryonic kidney (HEK)  
176 293T cells transiently expressing RaTG S protein, SARS-CoV S protein, WT SARS-  
177 CoV-2 S protein, Alpha variant (B.1.1.7, N501Y in RBD) S protein [38], Beta variant  
178 (B.1.351, K417N, E484K, and N501Y in RBD) S protein [39, 40] or Delta variant  
179 (B.1.617.2, L452R, T478K in RBD) S protein [41] were incubated with Bi-Nab<sub>35B5-  
180 47D10</sub>, Bi-Nab<sub>47D10-35B5</sub>, mAb 35B5 or mAb 47D10, respectively, followed by flow  
181 cytometry analysis. ACE2 was used as a positive control (Fig. 3A). Consistent with the  
182 previous results that mAb 35B5 is a SARS-CoV-2-specific neutralizing antibody  
183 targeting a conserved epitope on RBD, 35B5 easily detected the expression of four  
184 different SARS-CoV-2 S proteins on the HEK293T cell surface with no cross-reactivity  
185 of the RaTG S protein (Fig. 3B). Neither two parental mAbs nor two bsAbs showed a  
186 binding signal for the SARS-CoV S protein (data not shown). We found that mAb  
187 47D10 cross-reacted with RaTG S protein (Fig. 3C), which expands the minor cross-  
188 reaction of Bi-Nab<sub>35B5-47D10</sub> and Bi-Nab<sub>47D10-35B5</sub> to RaTG S protein (Fig. 3D and E).  
189 The surface spike protein of Alpha variant, Beta variant and Delta variant was readily  
190 detected by both Bi-Nab<sub>35B5-47D10</sub> and Bi-Nab<sub>47D10-35B5</sub> just as parental 35B5 mAb.  
191 Notably, both bsAbs significantly increased the affinity of the Delta variant S protein

192 (Fig. 3D and 3E). Taken together, Bi-Nab<sub>35B5-47D10</sub> can specifically bind to the native S  
193 proteins of SARS-CoV-2 VOCs and VBMs (Fig. 3F).

194 **Elevated neutralization sensitivity of Bi-Nab<sub>35B5-47D10</sub> to SARS-CoV-2 VBM**  
195 **variants.**

196 The emergence of SARS-CoV-2 VBMs with various mutations including Alpha  
197 (with N501Y in RBD, T716I, S982A and D1118H in S2), Beta (with K417N, E484K,  
198 and N501Y in RBD, A701 V in S2), Gamma (with K417T, E484K and N501Y in RBD,  
199 T1027I and V1176F in S2), Epsilon (with L452R in RBD), Eta (with E484K in RBD,  
200 F888 L in S2), Iota (with S477N and E484K in RBD, A701 V in S2), Mu (with R346K,  
201 E484K and N501Y in RBD, D950N in S2), Zeta (with E484K in RBD, V1176F in S2),  
202 1.617.3 (with L452R and E484K in RBD, D950N in S2) and Kappa (with L452R and  
203 E484Q in RBD, Q1071H in S2) escape neutralization and threaten efforts to contain  
204 the COVID-19 pandemic (Fig. 4A).

205 The rational design of bsAb is to avoid escape mutants. To initially assess the  
206 virus neutralization capacity of the two bsAbs in comparison to their parental mAbs  
207 35B5 and 47D10, we performed neutralization assays with pseudovirus. Because the  
208 two parental mAbs target the RBD and S2, respectively, we focused on mutations of  
209 VBMs that occur in the RBD and S2 regions (Fig. 4B). Alpha, beta and kappa variants  
210 were chosen to represent VBMs because these variants contain most of the VBM  
211 mutations (Fig. 4A). WT SARS-CoV-2, alpha, beta and kappa variants S protein  
212 pseudovirus were incubated with 35B5, 47D10, Bi-Nab<sub>35B5-47D10</sub> or Bi-Nab<sub>47D10-35B5</sub>,  
213 respectively, and their transduction was measured according to luciferase activities. As  
214 expected, Bi-Nab<sub>35B5-47D10</sub> neutralized WT SARS-CoV-2 S pseudovirus effectively  
215 with half maximum inhibitory concentration (IC<sub>50</sub>) values of 8.2 ng/ml (Fig. 5A) and  
216 displayed substantially improved neutralization breadth among the three VBM variants,  
217 especially for alpha and kappa variants (Fig. 5B-D). Among the four antibodies, Bi-  
218 Nab<sub>35B5-47D10</sub> and Bi-Nab<sub>47D10-35B5</sub> potently neutralized Alpha and Kappa variants and  
219 exhibited comparable neutralization potencies with much lower IC<sub>50</sub> values than



220 parental mAbs (Fig. 5B, 5D and 5E). Among the three VBM variants, the beta variant  
221 exhibited less sensitivity to the 35B5 mAb (Fig. 5C). Notably, Bi-Nab<sub>35B5-47D10</sub>  
222 increased the neutralization activity against the beta pseudovirus approximately 6-fold,  
223 with the lowest IC<sub>50</sub> value of 64.5 ng/ml compared with 35B5 (Fig. 5C and 5E).  
224 Therefore, these results suggest enhanced cross-reactivity of Bi-Nab<sub>35B5-47D10</sub>, as  
225 indicated by the elevated potency against the WT SARS-CoV-2, Alpha, Beta and  
226 Kappa variants (Fig. 5E).

### 227 **Bi-Nab<sub>35B5-47D10</sub> potently neutralizes SARS-CoV-2 Delta and Omicron variants.**

228 The delta variant and omicron variant are more transmissible than other variants  
229 and are linked to a resurgence of COVID-19 in many countries across the world. Finally,  
230 we set out to identify the neutralization properties of bsAbs on SARS-CoV-2 VOC  
231 delta and submicron variants. Compared to the mutations found in Delta, the Omicron  
232 lineage harbors more than thirty amino acid mutations in the spike protein, and most  
233 mutations are structurally focused in RBD (Fig. 6A) in regions accessible to antibodies  
234 at the top of the spike, increasing the likelihood of immune evasion (Fig. 6B) [42].  
235 Parental mAbs 35B5 and 47D10 exhibited comparable neutralization potencies against  
236 the Delta variant, with IC<sub>50</sub> values of 54.9 ng/ml and 45.2 ng/ml (Fig. 7A), respectively,  
237 whereas the neutralizing activity of mAbs 35B5 and 47D10 against Omicron variants  
238 was reduced substantially, possibly due to the more mutations in both S1 and S2 regions  
239 than Delta (Fig. 6B). 47D10 only slightly neutralized Omicron BA.1 with an IC<sub>50</sub> value  
240 of 1661.0 ng/mL (Fig. 7B); at the same time, it did not effectively neutralize Omicron  
241 BA.2 (Fig. 7C). These results are consistent with published studies showing that  
242 Omicron displays enhanced neutralization escape compared with other SARS-CoV-2  
243 variants. Interestingly, although Bi-Nab<sub>47D10-35B5</sub> exhibited substantially lower but  
244 detectable neutralization (146.1 ng/ml for Delta, 273.7 ng/ml for Omicron BA.1, 519.2  
245 ng/ml for Omicron BA.2). In comparison with 35B5, Bi-Nab<sub>35B5-47D10</sub> showed  
246 substantially higher neutralization titers against Delta, Omicron BA.1 and Omicron  
247 BA.2 variants than Bi-Nab<sub>47D10-35B5</sub> and parental mAbs with IC<sub>50</sub> values of 14.3 ng/ml,

248 27.6 ng/ml and 121.1 ng/ml, respectively (Fig. 7D). This indicates that the molecular  
249 topology of bsAbs substantially impacts the neutralizing activity against VOC variants.  
250 Notably, the neutralizing activity of Bi-Nab<sub>35B5-47D10</sub> against Omicron was largely  
251 enhanced when linking the scFv of 35B5 and 47D10, although mAb 47D10 only  
252 slightly neutralized Omicron (Fig. 7D). Collectively, Bi-Nab<sub>35B5-47D10</sub> potently  
253 neutralized both the Delta and Omicron variants and substantially increased the  
254 neutralization activity in comparison with their parental mAbs.

## 255 **Discussion**

256 The ongoing evolution of SARS-CoV-2 and the emergence of new SARS-CoV-2  
257 variants compromise the efficacy of current SARS-CoV-2 vaccines and licensed mAb  
258 therapies[43, 44]. The unusually high mutations of the Omicron variant with high  
259 spreads have resulted in breakthrough infections in the world since its first report in  
260 November 2021[45, 46]. It is still urgent to develop highly potent and broadly  
261 neutralizing mAbs targeting multiple SARS-CoV-2 variants[9, 47]. In this study, we  
262 generated a potent bispecific mAb Bi-Nab<sub>35B5-47D10</sub> targeting spike RBD and S2 in two  
263 distinct regions. Our results demonstrate that Bi-Nab<sub>35B5-47D10</sub> retained the specificity  
264 of their parental mAbs and increased potency and breadth compared with their parental  
265 mAbs. Bi-Nab<sub>35B5-47D10</sub> exhibited pan-neutralizing activities against WHO-stated  
266 SARS-CoV-2 VBMs and VOCs, including B.1.617.2 (Delta), Omicron BA.1 and  
267 Omicron BA.2 variants, highlighting its potential application in the prevention and  
268 treatment of SARS-CoV-2 VOCs.

269 Bispecific or multiple specific antibodies targeting different regions of the spike  
270 protein are a favorable strategy to treat COVID-19 caused by the ongoing emergence  
271 of new SARS-CoV-2 VOCs[48, 49]. Except for the increased threshold to produce  
272 neutralizing escape mutants, bispecific antibodies have practical and cost advantages  
273 over the mAb cocktail strategy since the complicated formulation of mAb cocktails  
274 routinely increases manufacturing costs and volumes. Here, we explored two SARS-  
275 CoV-2 neutralizing mAbs, 35B5 and 47D10, which target divergent spike regions and

276 block SARS-CoV-2 infection by distinct mechanisms. 35B5 binds to an invariant  
277 epitope in the RBD and causes dissociation of the spike trimer by a glycan displacement  
278 action[35]. The epitope of 35B5 in the RBD is invariant in SARS-CoV-2 WT, four  
279 VBMs and two Delta and Omicron VOCs[35, 36]. In addition to the earlier Omicron  
280 variants BA.1 and BA.2, more Omicron subvariants have emerged, including BA.3,  
281 BA.4 and BA.5[50, 51]. Among the identified Omicron subvariants, the BA.2  
282 subvariant is more contagious than other subvariants and is now the dominant strain  
283 globally[52]. Fortunately, the epitope of 35B5 on RBD does not contain the mutations  
284 of Omicron BA.1 and BA.2 (Fig. 6)[35, 50]. Crucially, Bi-Nab<sub>35B5-47D10</sub> further  
285 improved the potency to neutralize Omicron VOC in comparison with parental 35B5  
286 (Fig. 7). Therefore, it is rational that Bi-Nab<sub>35B10-47D10</sub> will potentially be of interest for  
287 further clinical development for COVID-19 treatment.

## 288 **Materials and Methods**

### 289 **Design and expression of bispecific antibodies.**

290 Plasmids containing the heavy and light chain genes for the production of the  
291 monoclonal antibodies 35B5 and 47D10 were prepared as previously described [53].  
292 Single-chain Fv format bispecific antibodies were designed from the sequences of the  
293 variable regions of monoclonal antibodies 35B5 and 47D10 (ScFv 35B5-47D10) or  
294 47D10 and 35B5 (ScFv 47D10-35B5), utilizing tandem glycine-serine (G4S) peptide  
295 linkers. Codon-optimized ScFvs DNA sequences were synthesized and cloned into the  
296 pUC57 cloning vector (GenScript, Piscataway, NJ) and subcloned into the eukaryotic  
297 cell expression vector AbVec-hIgG1 between the AgeI and Hind III sites.

298 The ExpiCHO<sup>TM</sup> Expression System (Thermo Fisher) was used to produce bsAbs.  
299 Briefly, following the manufacturer's max titer protocol, 25 ml ( $6 \times 10^6$  cells/ml)  
300 ExpiCHO-S<sup>TM</sup> cells in a 125 ml flask were transfected with a master mixture containing  
301 25 µg bispecific antibody plasmid and 80 µl ExpiFectamine<sup>TM</sup> CHO reagent diluted in  
302 1 ml cold OptiPRO<sup>TM</sup> SFM complexation medium. The ExpiFectamine<sup>TM</sup> CHO/DNA  
303 complexes were added to the cells immediately or after up to 5 minutes of incubation

304 at room temperature without any loss of performance. The cells were incubated on an  
305 orbital shaker at 37°C with a humidified atmosphere of 8% CO<sub>2</sub> humidified in air  
306 without the need to change or add media. On the day after transfection, 150 µl  
307 ExpiCHO™ enhancer and 6 ml ExpiCHO™ feed were added to the flask. A second  
308 volume of ExpiCHO™ feed was added to cultured cells on day 5 posttransfection, and  
309 the flask was immediately returned to the shaking incubator. Supernatants were  
310 harvested at 4000-5000 x g for 30 minutes in a refrigerated centrifuge, and the  
311 supernatant was filtered through a 0.22 µm filter on day 12 posttransfection.

### 312 **Bispecific antibody isolation and purification.**

313 Briefly, bsAbs were efficiently purified by using Protein A Sepharose affinity  
314 chromatography medium (GenScript, L00210-10). The purified antibodies were  
315 separated on a 7.5%–12% polyacrylamide gel and revealed with Coomassie blue under  
316 reducing or nonreducing conditions. To assure functionality, stability, and batch-to-  
317 batch consistency, all antibodies were subjected to quality control and biophysical  
318 characterization.

### 319 **Cells and plasmids.**

320 HEK293T cells producing pseudovirus and HEK293 cells overexpressing  
321 recombinant human ACE2 (293/hACE2) were preserved in our laboratory and  
322 maintained in Dulbecco's modified Eagle's medium (DMEM, Thermo Fisher)  
323 containing 10% fetal bovine serum (FBS, Gibco) and 1% penicillin–streptomycin and  
324 were incubated at 37°C with 5% CO<sub>2</sub> and 95% humidity. ExpiCHO-S™ cells (Thermo  
325 Fisher) were cultured in ExpiCHO™ expression medium in 125 mL shaker flasks in a  
326 37°C incubator with ≥ 80% relative humidity and 8% CO<sub>2</sub> on an orbital shaker with a  
327 50 mm shaking diameter rotating at 95 rpm. For routine maintenance, ExpiCHO-S™  
328 cells were typically passaged every 3 days at a ratio of 1:20 when they were grown to  
329 3-5×10<sup>6</sup> cells/mL. The pcDNA3.1-hACE2 plasmid with human codon optimization,  
330 plasmids encoding WT SARS-CoV-2 S glycoprotein, SARS-CoV-2 VBM spike  
331 protein, SARS-CoV-2 VOC S glycoprotein, RaTG S glycoprotein, lentiviral packaging

332 plasmid psPAX2 and pLenti-GFP lentiviral reporter plasmid were generously gifted by  
333 Dr. Zhaohui Qian.

#### 334 **Enzyme-linked immunosorbent assay**

335 To evaluate antibody characterization in vitro, the ELISA method with  
336 modifications was used as reported previously[54]. In brief, 50 nanograms (ng) of  
337 SARS-CoV-2 S1 protein of the WT strain (Sino Biological, 40591-V08H) or B.1.1.7  
338 (Sino Biological, 40591-V08H7) or SARS-CoV-2 S2 (Sino Biological, 40590-V08B)  
339 protein or SARS-CoV-2 RBD protein (Sino Biological, 40592-V08B) was coated on  
340 ELISA plates in 100  $\mu$ l per well at 37°C for 2 hours or 4°C overnight. After washing 3  
341 times with PBST, blocking buffer with 5% FBS and 0.05% Tween 20 was added to the  
342 ELISA plates and incubated for 1 hour at 37°C. Next, 100  $\mu$ l serially diluted mAbs or  
343 bsAbs was added to each well in 100  $\mu$ l blocking buffer for 1 hour at 37°C. Following  
344 washing 3 times, mouse anti-human IgG Fc secondary antibody with HRP (Abcam)  
345 was added and incubated at 37°C for 1 h, followed by washing with PBST. The ELISA  
346 plates were reacted with 3,3',5,5'-tetramethylbenzidine (TMB, Sigma) substrate at  
347 25°C for 5 minutes and then stopped by 0.2 M H<sub>2</sub>SO<sub>4</sub> stop buffer. The optical density  
348 (OD) at 450 nm was measured using an iMark microplate absorbance reader (BIO-  
349 RAD). Nonlinear regression was used to calculate the EC<sub>50</sub>.

#### 350 **ELISA-based receptor-binding inhibition of hACE2**

351 The ability of antibodies to inhibit the binding of the SARS-CoV-2 RBD to  
352 hACE2 was investigated by ELISA. The 96-well ELISA plates were coated with 200  
353 ng of hACE2 protein (Sino Biological, 10108-H08H) per well overnight at 4°C, washed  
354 with PBST and blocked for 1 hour with blocking buffer as above. Meanwhile, fivefold  
355 serial dilutions of mAbs or bispecific antibodies were incubated with 4 ng/mL SARS-  
356 CoV-2 RBD with mouse IgG FC tag protein (Sino Biological, 40592-V05H) for 1 hour  
357 at 25°C. Then, the mixtures were added to ELISA plates and incubated for 1 hour at  
358 37°C. After further washing, bound SARS-CoV-2 RBD protein was detected with anti-  
359 mouse Fc HRP antibody (Abcam) diluted 1:10000 in blocking solution followed by

360 washing with PBST. The ELISA plates were reacted with TMB substrate at 25°C for 5  
361 minutes and then stopped by 0.2 M H<sub>2</sub>SO<sub>4</sub> stop buffer and determined at OD 450 nm.  
362 The IC<sub>50</sub> was determined by using 4-parameter logistic regression.

### 363 **SARS-CoV-2 pseudotyped reporter virus and pseudotyped virus neutralization** 364 **assay**

365 Generation of SARS-CoV-2 or SARS-CoV-2 VOC-type pseudovirus was  
366 performed as previously described[55]. In brief, pseudoviruses were produced by using  
367 PEI to cotransfect 293T cells with psPAX2, pLenti-GFP and plasmids encoding SARS-  
368 CoV-2 S, SARS-CoV-2 VOCs S, SARS-CoV S, RaTG S or empty vector at a ratio of  
369 1:1:1. The media was replaced with fresh media containing 10% fetal bovine serum and  
370 1% penicillin–streptomycin 4 hours post-transfection. The supernatants were harvested  
371 48 hours post-transfection and centrifuged at 800 ×g for 5 min to remove cell debris  
372 before passing through a 0.45 µm filter.

373 For the pseudovirus neutralization assay, HEK293 (hACE2/293) cells 80-90%  
374 confluent in T75 cell culture flasks were transfected with 20 µg of plasmid encoding  
375 hACE2 for 36 hours and seeded into 24-well plates the day before transduction with  
376 pseudovirus. Fivefold serially diluted bsAbs or mAbs were incubated with SARS-CoV-  
377 2 pseudotyped virus for 1 hour. The 500 µl per well mixture was subsequently  
378 incubated with hACE2/293 cells overnight, and then the mixture was changed to fresh  
379 media. Approximately 48 hours post-incubation, the luciferase activity of SARS-CoV-  
380 2-type pseudovirus-infected hACE2/293 cells was detected by the Dual-Luciferase  
381 Reporter Assay System (Promega), and cells were lysed with 120 µl medium containing  
382 50% Steady-Glo and 50% complete cell growth medium at room temperature for 5  
383 minutes. The percentage of infection was normalized to those derived from cells  
384 infected with SARS-CoV-2 pseudotyped virus in the absence of antibodies. The IC<sub>50</sub>  
385 was determined by using 4-parameter logistic regression.

### 386 **Flow cytometry-based bsAb binding assay.**

387 HEK293T cells 80-90% confluent in 6-well cell culture plates were transfected  
388 with 2 µg of plasmids encoding either WT SARS-CoV-2 S or SARS-CoV-2 mutated S  
389 protein or SARS-CoV S protein or RaTG S protein using linear polyethylenimine (PEI,  
390 Sigma–Aldrich, 408727). A total amount of 2 µg DNA diluted in 1 ml per well of  
391 DMEM was mixed with PEI in a 1:2 ratio. The transfection mixture was added to cell  
392 culture plates with DMEM in a dropwise manner after 15 minutes of incubation at room  
393 temperature. After 4-6 hours of incubation at 37°C under 5% CO<sub>2</sub>, the medium was  
394 changed to fresh complete cell growth medium (DMEM supplemented with 10% FBS  
395 and 1% penicillin–streptomycin). Cells were detached by using PBS with 1 mM EDTA  
396 40 hours post-transfection and washed with cold PBS containing 2% FBS. After  
397 washing, the cells were incubated with bsAbs, monoclonal human anti-SARS-CoV-2  
398 RBD antibody 35B5 or monoclonal human anti-SARS-CoV-2 S2 antibody 47D10 (5  
399 µg per well) for 1 hour on ice, followed by FITC-conjugated anti-human IgG (1:100)  
400 (ZSGB-Bio, ZF-0308) for 1 hour on ice away from light. Cells were acquired by flow  
401 cytometry (BD Biosciences) and analyzed using FlowJo.

#### 402 **Statistical analysis.**

403 All statistical analyses were performed using GraphPad Prism 9.0 software. In the  
404 ELISA, three independent experiments were performed, and the mean values ± SEM  
405 and the EC<sub>50</sub> values were calculated by using sigmoidal dose–response nonlinear  
406 regression. In the ELISA-based inhibition assay and pseudovirus neutralization assay,  
407 three or two independent experiments were performed, and the mean values ± SEM and  
408 the IC<sub>50</sub> values were plotted by fitting a nonlinear four-parameter dose–response curve.  
409 The figure legends show all of the statistical details of the experiments. PyMol was  
410 used to prepare all the structure figures (Schrodinger:  
411 <https://www.schrodinger.com/pymol>).

#### 412 **Acknowledgments**

413 The work was supported by the National Natural Science Foundation of China

414 (32192453) and the Chinese Universities Scientific Fund (2022RC019). The content is  
415 solely the authors' responsibility and does not necessarily represent the official views  
416 of the funding resources.

#### 417 **Figure legends**

418 **Fig. 1. Construction and generation of bsAbs.** (A and B) Overview of the strategy  
419 for designing bsAbs. Schematic diagram of the molecular configurations of Bi-Nab<sub>35B5-</sub>  
420 <sub>47D10</sub> (A) and Bi-Nab<sub>47D10-35B5</sub> (B). (C) Schematic presentation of the bsAbs. Antibody  
421 domains are color-coded according to their architecture (green, variable light chain of  
422 35B5; red, variable heavy chain of 35B5; blue, variable light chain of 47D10; yellow,  
423 variable heavy chain of 47D10; gray, human IgG1 Fc). (D) Reduced SDS–PAGE  
424 analysis of two bsAbs and two parental mAbs. The proteins were analyzed under  
425 reducing conditions (+DTT). H and L denote the heavy and light chains, respectively.  
426 The molecular weight of the bsAbs monomer was 90 kD. M, molecular weight standard.  
427 (E) Nonreduced SDS–PAGE analysis of affinity purified bsAbs and parental mAbs.  
428 All four antibodies were expressed in ExpiCHO-S™ cells and captured on Protein-A  
429 affinity resin. The proteins were analyzed under direct affinity elution conditions  
430 (without DTT). Three independent experiments were performed at this scale with the  
431 same results. Additional independent experiments yielded similar results at larger  
432 culture volumes.

433 **Fig. 2. Binding and inhibition properties of bsAbs.** (A and B) ELISA binding assay  
434 of bsAbs and parental mAbs to S1 proteins (A) or S2 protein (B) of WT SARS-CoV-2.  
435 EC<sub>50</sub>, concentration for 50% of maximal effect. (C) ELISA analysis of bsAbs or  
436 parental mAbs-mediated inhibition of WT RBD proteins binding to ACE2. IC<sub>50</sub>, half  
437 maximal inhibitory concentration. (D) ELISA analysis of bsAbs or parental mAbs  
438 binding to the mutated S1 protein of SARS-CoV-2, including HV69-70 deletion,  
439 N501Y and D614G. (E) Representative EC<sub>50</sub> and IC<sub>50</sub> titers (in nanograms per milliliter)  
440 of bsAbs and parental mAbs showing the effective binding and inhibiting activity of  
441 Bi-Nab<sub>35B5-47D10</sub>.



442 **Fig. 3. Binding kinetics of bsAbs to cell surface-associated coronavirus S protein.**

443 (A-E) Binding of bsAbs or parental mAbs to RaTG S, WT SARS-CoV-2 S, Alpha S,  
444 Beta S or Delta S proteins. HEK293T cells were transfected to transiently express  
445 RaTG S, WT SARS-CoV-2, Alpha S, Beta S or Delta S proteins and incubated with  
446 mAb 35B5 (B), mAb 47D10 (C), Bi-Nab<sub>35B5-47D10</sub> (D) and Bi-Nab<sub>47D10-35B5</sub> (E),  
447 respectively, for 1 h on ice. Soluble hACE2 with a His tag was used as a positive control  
448 (A), followed by a FITC-conjugated anti-human IgG Fc or FITC-conjugated anti-His  
449 antibody. Then, the cells were analyzed by flow cytometry. Mean fluorescence intensity  
450 (MFI) was normalized to the empty vector (mock) group (F). The experiments were  
451 performed three times, and one representative is shown.

452 **Fig. 4. RBD and S2 mutations of VBM variants.** (A) Statistics on VBM RBD and S2  
453 mutations are displayed. (B) The crystal structure of the SARS-CoV-2 spike trimer  
454 (PDB ID 7KRQ) highlighting the mutational landscape of VBM variants relative to WT  
455 SARS-CoV-2. The epitopes of the RBD (bright blue) and S2 (dark red) regions are  
456 shown. The mutations are indicated by yellow (RBD mutations) and green (S2  
457 mutations) spheres on the surface of the S trimer using the PyMOL software suite.

458 **Fig. 5. Neutralization of bsAbs against WT and VBM pseudoviruses.** (A-D) Two  
459 parental mAbs and two bsAbs mediated neutralization of the indicated pseudovirus.  
460 WT SARS-CoV-2 S (A), Alpha S (B), Beta S (C) or Kappa S (D) pseudovirus were  
461 preincubated with fivefold serially diluted Bi-Nab<sub>47D10-35B5</sub>, Bi-Nab<sub>35B5-47D10</sub>, 47D10 or  
462 35B5. Then, the mixture was added to HEK293 cells transiently expressing hACE2 and  
463 lysed 48 h later, and their transduction was measured according to luciferase activities.  
464 Potencies were calculated against sensitive viruses, and heatmaps of IC<sub>50</sub> titers were  
465 generated in Excel. Warmer colors indicate more potent neutralization. Breadths based  
466 on IC<sub>50</sub>s are also summarized (E). Representative IC<sub>50</sub> titers (in nanograms per milliliter)  
467 and neutralization breadth of bsAbs and the parental mAbs showing the improved  
468 neutralization activity of Bi-Nab<sub>35B5-47D10</sub>. The experiment was performed twice, and a  
469 representative is shown. Error bars represent the SEM of technical triplicates.

470 **Fig. 6. RBD and S2 mutations of VOC variants.** (A) Schematic of VOC RBD and  
471 S2 mutations is illustrated. (B) Top view (left panel) and side view (right panel) of spike  
472 trimer are shown with mutations in RBD and S2 and highlighted with residue atoms as  
473 colored spheres indicated in yellow (RBD mutations, the red font indicates the  
474 mutations unique to Omicron variant and the pink refers to the mutations common to  
475 VOCs) and green (S2 mutations) on the surface of the S trimer (PDB ID 7KRQ).

476 **Fig. 7. Cross-reactive neutralization of bsAbs against delta and submicron**  
477 **pseudoviruss.** Using a lentiviral-based pseudovirus system, the neutralization potency  
478 of two parental mAbs and two bsAbs against Delta (A), Omicron BA.1 (B) and  
479 Omicron BA.2 (C) pseudoviruses were analyzed. The IC<sub>50</sub> was determined by log  
480 (inhibitor) response of nonlinear regression, and bars and error bars depict the mean  
481 and standard error of the mean. (D) Bi-Nab<sub>35B5-47D10</sub> exhibited significantly improved  
482 neutralization activity compared to Bi-Nab<sub>47D10-35B5</sub> and parental mAbs. IC<sub>50</sub> titers (in  
483 nanograms per milliliter), breadth and potency of two bsAbs and two parental mAbs  
484 against Delta and Omicron pseudovirus are presented with heatmaps.

485 **Fig. S1. Isolation of SARS-CoV-2 S2 targeted mAb from COVID-19 convalescent**  
486 **patients.** (A) Isolation strategy of SARS-CoV-2 S2 mAb 47D10 from COVID-19  
487 convalescent patients. (B) Flow cytometry analysis of SARS-CoV-2 S2-specific B cells  
488 from the PBMCs of healthy donors and COVID-19 convalescent patients. The numbers  
489 adjacent to the outlined area indicate the proportions of SARS-CoV-2 S2-specific B  
490 cells in CD19+CD20+IgG+ B cells.

## 491 **References**

- 492 1. Arora, P., et al., *Delta variant (B.1.617.2) sublineages do not*  
493 *show increased neutralization resistance.* Cell Mol Immunol,  
494 2021. **18**(11): p. 2557-2559.
- 495 2. Bruel, T., et al., *Serum neutralization of SARS-CoV-2 Omicron*  
496 *sublineages BA.1 and BA.2 in patients receiving monoclonal*  
497 *antibodies.* Nat Med, 2022.

- 498 3. Mlcochova, P., et al., *SARS-CoV-2 B.1.617.2 Delta variant*  
499 *replication and immune evasion*. Nature, 2021. **599**(7883): p.  
500 114-119.
- 501 4. Liu, L., et al., *Striking antibody evasion manifested by the*  
502 *Omicron variant of SARS-CoV-2*. Nature, 2022. **602**(7898): p. 676-  
503 681.
- 504 5. Planas, D., et al., *Reduced sensitivity of SARS-CoV-2 variant*  
505 *Delta to antibody neutralization*. Nature, 2021. **596**(7871): p.  
506 276-280.
- 507 6. Zhou, D., et al., *Evidence of escape of SARS-CoV-2 variant*  
508 *B.1.351 from natural and vaccine-induced sera*. Cell, 2021.  
509 **184**(9): p. 2348-2361.e6.
- 510 7. Yuan, M., et al., *Structural basis of a shared antibody*  
511 *response to SARS-CoV-2*. Science, 2020. **369**(6507): p. 1119-1123.
- 512 8. Cerutti, G., et al., *Potent SARS-CoV-2 neutralizing antibodies*  
513 *directed against spike N-terminal domain target a single*  
514 *supersite*. Cell Host Microbe, 2021. **29**(5): p. 819-833.e7.
- 515 9. Barnes, C.O., et al., *SARS-CoV-2 neutralizing antibody*  
516 *structures inform therapeutic strategies*. Nature, 2020.  
517 **588**(7839): p. 682-687.
- 518 10. McCallum, M., et al., *N-terminal domain antigenic mapping*  
519 *reveals a site of vulnerability for SARS-CoV-2*. Cell, 2021.  
520 **184**(9): p. 2332-2347.e16.
- 521 11. Wibmer, C.K., et al., *SARS-CoV-2 501Y.V2 escapes neutralization*  
522 *by South African COVID-19 donor plasma*. Nat Med, 2021. **27**(4):  
523 p. 622-625.
- 524 12. Garcia-Beltran, W.F., et al., *Multiple SARS-CoV-2 variants*  
525 *escape neutralization by vaccine-induced humoral immunity*.  
526 Cell, 2021. **184**(9): p. 2372-2383.e9.
- 527 13. Odak, I., et al., *Longitudinal Tracking of Immune Responses in*  
528 *COVID-19 Convalescents Reveals Absence of Neutralization*  
529 *Activity Against Omicron and Staggered Impairment to Other*  
530 *SARS-CoV-2 Variants of Concern*. Front Immunol, 2022. **13**: p.  
531 863039.
- 532 14. Ye, G., B. Liu, and F. Li, *Cryo-EM structure of a SARS-CoV-2*  
533 *omicron spike protein ectodomain*. Nat Commun, 2022. **13**(1): p.  
534 1214.
- 535 15. Torjesen, I., *Covid-19: Omicron may be more transmissible than*  
536 *other variants and partly resistant to existing vaccines,*  
537 *scientists fear*. Bmj, 2021. **375**: p. n2943.

- 538 16. Pulliam, J.R.C., et al., *Increased risk of SARS-CoV-2*  
539 *reinfection associated with emergence of Omicron in South*  
540 *Africa*. Science, 2022: p. eabn4947.
- 541 17. Carreno, J.M., et al., *Activity of convalescent and vaccine*  
542 *serum against SARS-CoV-2 Omicron*. Nature, 2022. **602**(7898): p.  
543 682-688.
- 544 18. Iketani, S., et al., *Antibody evasion properties of SARS-CoV-2*  
545 *Omicron sublineages*. Nature, 2022.
- 546 19. Cao, Y., et al., *Omicron escapes the majority of existing SARS-*  
547 *CoV-2 neutralizing antibodies*. Nature, 2022. **602**(7898): p. 657-  
548 663.
- 549 20. Hoffmann, M., et al., *The Omicron variant is highly resistant*  
550 *against antibody-mediated neutralization: Implications for*  
551 *control of the COVID-19 pandemic*. Cell, 2022. **185**(3): p. 447-  
552 456. e11.
- 553 21. Walter, J.D., et al., *Biparatopic antibodies neutralize SARS-CoV-*  
554 *2 variants of concern and mitigate drug resistance*. EMBO Rep,  
555 2022. **23**(4): p. e54199.
- 556 22. De Gasparo, R., et al., *Bispecific IgG neutralizes SARS-CoV-2*  
557 *variants and prevents escape in mice*. Nature, 2021. **593**(7859):  
558 p. 424-428.
- 559 23. Huang, Y., et al., *Engineered Bispecific Antibodies with*  
560 *Exquisite HIV-1-Neutralizing Activity*. Cell, 2016. **165**(7): p.  
561 1621-1631.
- 562 24. Zhao, Q., *Bispecific Antibodies for Autoimmune and Inflammatory*  
563 *Diseases: Clinical Progress to Date*. BioDrugs, 2020. **34**(2): p.  
564 111-119.
- 565 25. Wang, J., et al., *A Human Bi-specific Antibody against Zika*  
566 *Virus with High Therapeutic Potential*. Cell, 2017. **171**(1): p.  
567 229-241. e15.
- 568 26. Bournazos, S., et al., *Bispecific Anti-HIV-1 Antibodies with*  
569 *Enhanced Breadth and Potency*. Cell, 2016. **165**(7): p. 1609-1620.
- 570 27. Yao, H., et al., *Rational development of a human antibody*  
571 *cocktail that deploys multiple functions to confer Pan-SARS-*  
572 *CoVs protection*. Cell Res, 2021. **31**(1): p. 25-36.
- 573 28. Weinreich, D.M., et al., *REGN-COV2, a Neutralizing Antibody*  
574 *Cocktail, in Outpatients with Covid-19*. N Engl J Med, 2021.  
575 **384**(3): p. 238-251.
- 576 29. Shima, M., et al., *Factor VIII-Mimetic Function of Humanized*  
577 *Bispecific Antibody in Hemophilia A*. N Engl J Med, 2016.  
578 **374**(21): p. 2044-53.

- 579 30. Suurs, F.V., et al., *A review of bispecific antibodies and*  
580 *antibody constructs in oncology and clinical challenges.*  
581 *Pharmacol Ther*, 2019. **201**: p. 103-119.
- 582 31. Hoffmann, M., H. Kleine-Weber, and S. Pöhlmann, *A Multibasic*  
583 *Cleavage Site in the Spike Protein of SARS-CoV-2 Is Essential*  
584 *for Infection of Human Lung Cells.* *Mol Cell*, 2020. **78**(4): p.  
585 779-784. e5.
- 586 32. Walls, A.C., et al., *Structure, Function, and Antigenicity of*  
587 *the SARS-CoV-2 Spike Glycoprotein.* *Cell*, 2020. **181**(2): p. 281-  
588 292. e6.
- 589 33. Zhou, P., et al., *Broadly neutralizing anti-S2 antibodies*  
590 *protect against all three human betacoronaviruses that cause*  
591 *severe disease.* *bioRxiv*, 2022.
- 592 34. Steinhardt, J.J., et al., *Rational design of a trispecific*  
593 *antibody targeting the HIV-1 Env with elevated anti-viral*  
594 *activity.* *Nat Commun*, 2018. **9**(1): p. 877.
- 595 35. Wang, X., et al., *35B5 antibody potently neutralizes SARS-CoV-2*  
596 *Omicron by disrupting the N-glycan switch via a conserved Spike*  
597 *epitope.* *Cell Host & Microbe*, 2022.
- 598 36. Wang, X., et al., *A potent human monoclonal antibody with pan-*  
599 *neutralizing activities directly dislocates S trimer of SARS-*  
600 *CoV-2 through binding both up and down forms of RBD.* *Signal*  
601 *Transduct Target Ther*, 2022. **7**(1): p. 114.
- 602 37. Chen, X., et al., *Disease severity dictates SARS-CoV-2-specific*  
603 *neutralizing antibody responses in COVID-19.* *Signal Transduct*  
604 *Target Ther*, 2020. **5**(1): p. 180.
- 605 38. Brown, K.A., et al., *S-Gene Target Failure as a Marker of*  
606 *Variant B.1.1.7 Among SARS-CoV-2 Isolates in the Greater*  
607 *Toronto Area, December 2020 to March 2021.* *Jama*, 2021. **325**(20):  
608 p. 2115-2116.
- 609 39. Hoffmann, M., et al., *SARS-CoV-2 variants B.1.351 and P.1*  
610 *escape from neutralizing antibodies.* *Cell*, 2021. **184**(9): p.  
611 2384-2393. e12.
- 612 40. Tegally, H., et al., *Detection of a SARS-CoV-2 variant of*  
613 *concern in South Africa.* *Nature*, 2021. **592**(7854): p. 438-443.
- 614 41. Edara, V.V., et al., *Infection and vaccine-induced neutralizing*  
615 *antibody responses to the SARS-CoV-2 B.1.617.1 variant.*  
616 *bioRxiv*, 2021.
- 617 42. Garcia-Beltran, W.F., et al., *mRNA-based COVID-19 vaccine*  
618 *boosters induce neutralizing immunity against SARS-CoV-2*  
619 *Omicron variant.* *Cell*, 2022. **185**(3): p. 457-466. e4.

- 620 43. Mileto, D., et al., *Reduced neutralization of SARS-CoV-2*  
621 *Omicron variant by BNT162b2 vaccinees' sera: a preliminary*  
622 *evaluation*. *Emerg Microbes Infect*, 2022. **11**(1): p. 790-792.
- 623 44. Dejnirattisai, W., et al., *Cross-reacting antibodies enhance*  
624 *dengue virus infection in humans*. *Science*, 2010. **328**(5979): p.  
625 745-8.
- 626 45. He, X., et al., *SARS-CoV-2 Omicron variant: Characteristics and*  
627 *prevention*. *MedComm* (2020), 2021. **2**(4): p. 838-45.
- 628 46. Gobeil, S.M., et al., *Structural diversity of the SARS-CoV-2*  
629 *Omicron spike*. *Mol Cell*, 2022.
- 630 47. Zhou, H., et al., *Neutralization of SARS-CoV-2 Omicron BA.2 by*  
631 *Therapeutic Monoclonal Antibodies*. *bioRxiv*, 2022.
- 632 48. Cho, H., et al., *Bispecific antibodies targeting distinct*  
633 *regions of the spike protein potently neutralize SARS-CoV-2*  
634 *variants of concern*. *Sci Transl Med*, 2021. **13**(616): p.  
635 eabj5413.
- 636 49. Li, Z., et al., *An engineered bispecific human monoclonal*  
637 *antibody against SARS-CoV-2*. *Nat Immunol*, 2022. **23**(3): p. 423-  
638 430.
- 639 50. Arora, P., et al., *Comparable neutralisation evasion of SARS-*  
640 *CoV-2 omicron subvariants BA.1, BA.2, and BA.3*. *Lancet Infect*  
641 *Dis*, 2022.
- 642 51. Khan, K., et al., *Omicron sub-lineages BA.4/BA.5 escape BA.1*  
643 *infection elicited neutralizing immunity*. *medRxiv*, 2022: p.  
644 2022.04.29.22274477.
- 645 52. Mahase, E., *Omicron sub-lineage BA.2 may have "substantial*  
646 *growth advantage," UKHSA reports*. *BMJ*, 2022. **376**: p. o263.
- 647 53. Chen, X., et al., *Human monoclonal antibodies block the binding*  
648 *of SARS-CoV-2 spike protein to angiotensin converting enzyme 2*  
649 *receptor*. *Cell Mol Immunol*, 2020. **17**(6): p. 647-649.
- 650 54. Yue, S., et al., *Sensitivity of SARS-CoV-2 Variants to*  
651 *Neutralization by Convalescent Sera and a VH3-30 Monoclonal*  
652 *Antibody*. *Front Immunol*, 2021. **12**: p. 751584.
- 653 55. Ou, X., et al., *Characterization of spike glycoprotein of SARS-*  
654 *CoV-2 on virus entry and its immune cross-reactivity with SARS-*  
655 *CoV*. *Nat Commun*, 2020. **11**(1): p. 1620.

656

Fig 1

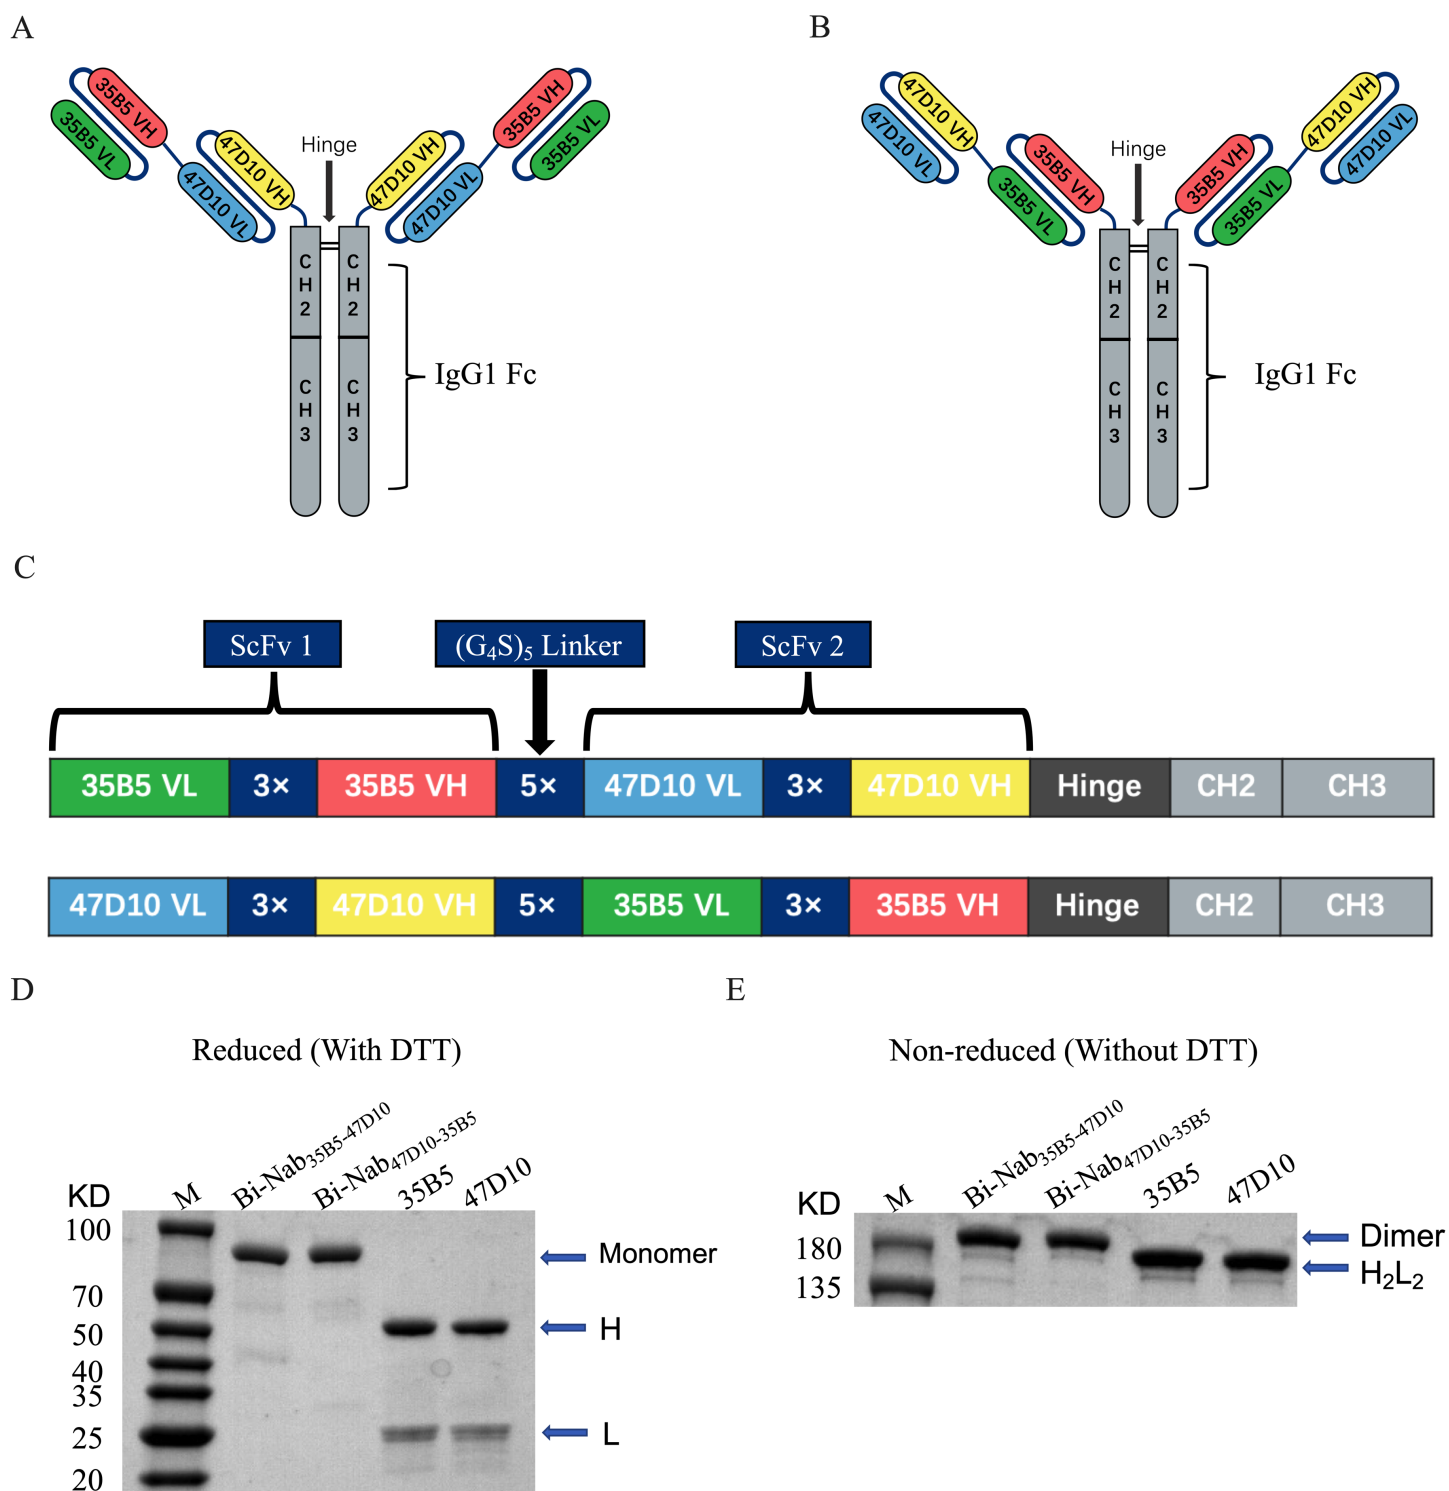

Fig 2

A

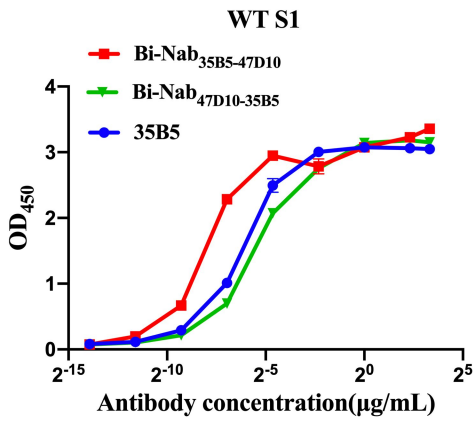

B

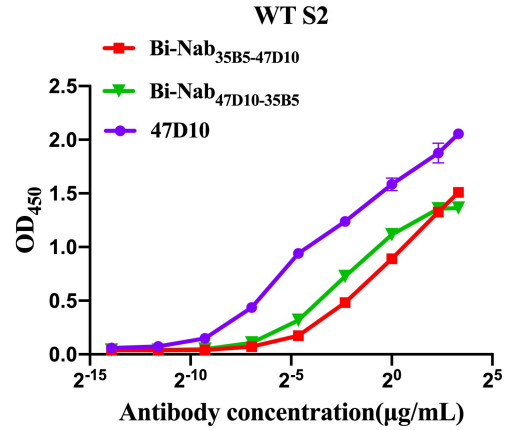

C

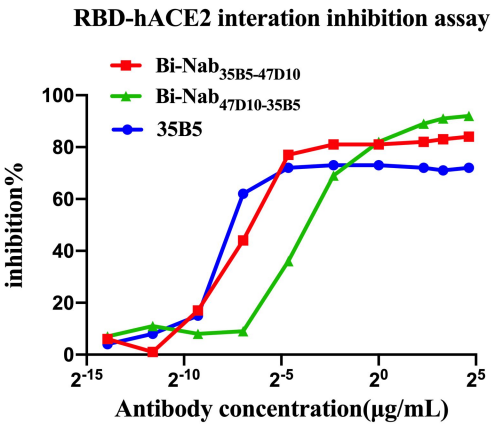

D

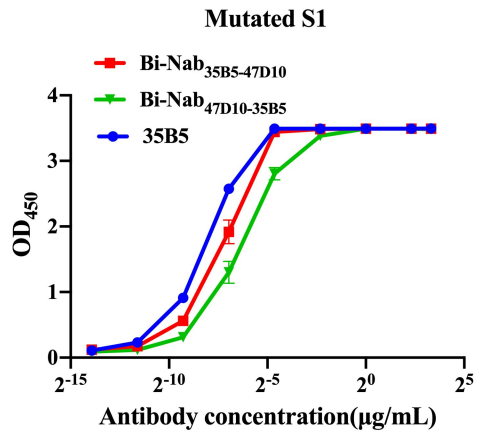

E

| EC <sub>50</sub> Titers (ng/ml) |                              |                              |      |       |
|---------------------------------|------------------------------|------------------------------|------|-------|
|                                 | Bi-Nab <sub>35B5-47D10</sub> | Bi-Nab <sub>47D10-35B5</sub> | 35B5 | 47D10 |
| WT S1 protein                   | 4.2                          | 25.2                         | 14.3 | /     |
| Mutated S1 protein              | 7.2                          | 13.0                         | 3.8  | /     |
| WT S2 protein                   | 1131.0                       | 208.2                        | /    | 111.0 |

| IC <sub>50</sub> Titers (ng/ml) |                              |                  |                              |                  |          |                  |          |                  |
|---------------------------------|------------------------------|------------------|------------------------------|------------------|----------|------------------|----------|------------------|
|                                 | Bi-Nab <sub>35B5-47D10</sub> |                  | Bi-Nab <sub>47D10-35B5</sub> |                  | 35B5     |                  | 47D10    |                  |
|                                 | %Breadth                     | IC <sub>50</sub> | %Breadth                     | IC <sub>50</sub> | %Breadth | IC <sub>50</sub> | %Breadth | IC <sub>50</sub> |
| RBD-hACE2                       | 84                           | 11.3             | 92                           | 86.6             | 72       | 7.8              | /        | /                |



A

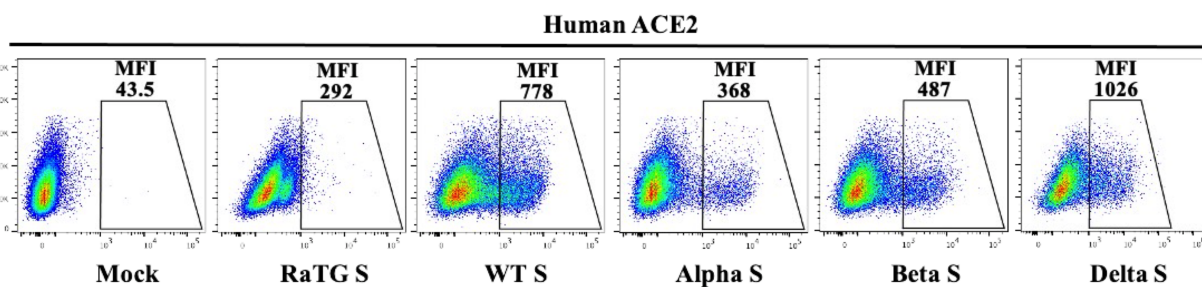

B

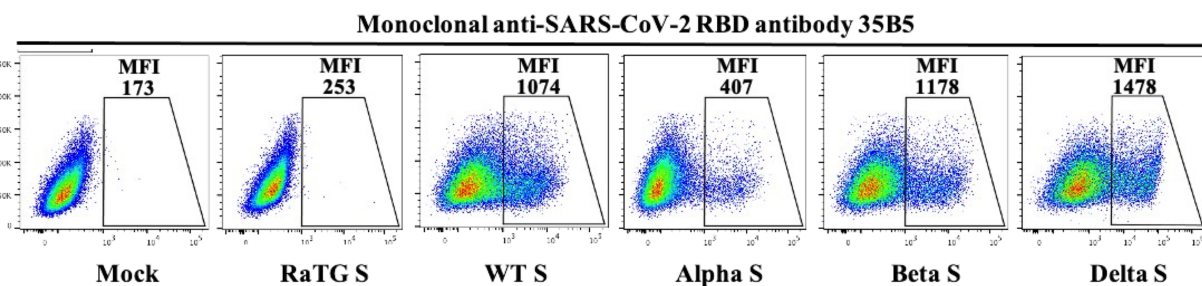

C

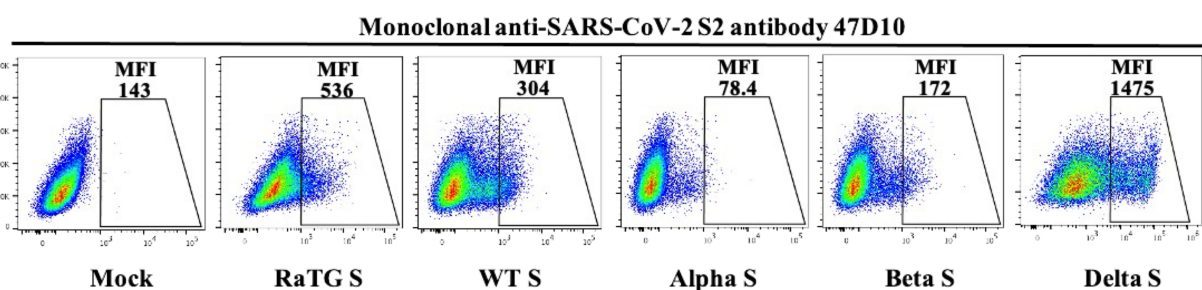

D

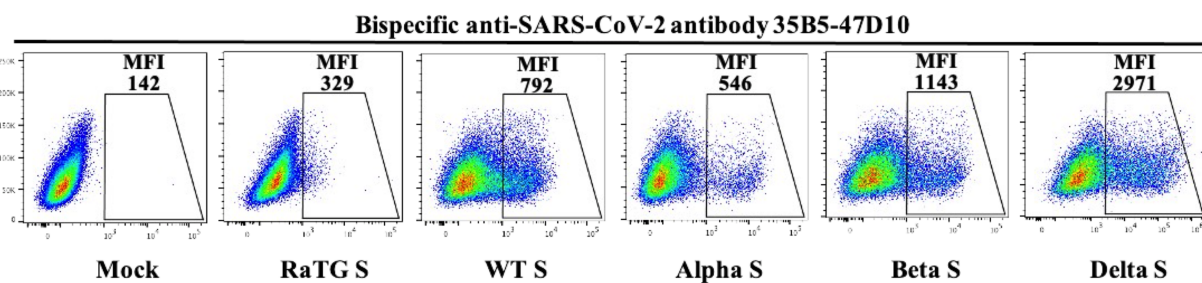

E

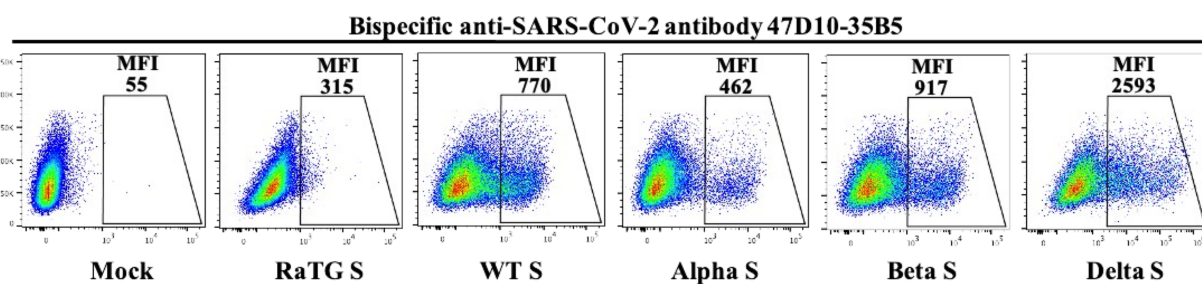

F

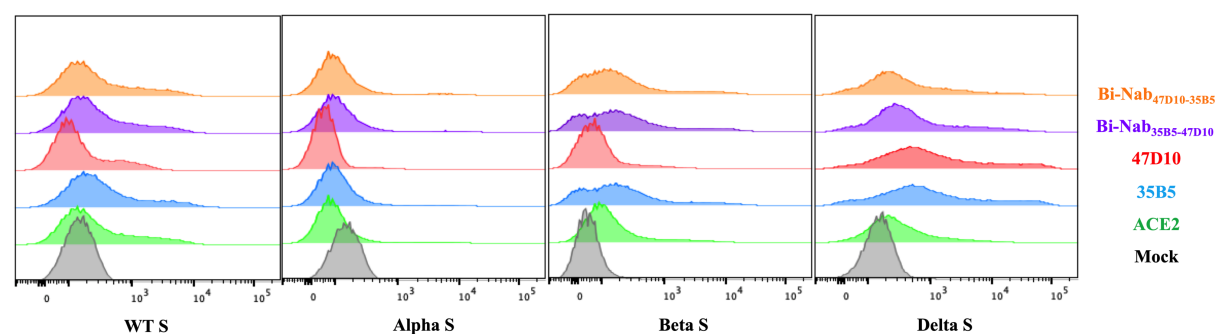

Fig 4

A

| SARS-CoV-2 variants |                           | Mutations in RBD    | Mutations in S2      |
|---------------------|---------------------------|---------------------|----------------------|
| VBM                 | Alpha (B.1.1.7)           | N501Y               | T716I, S982A, D1118H |
|                     | Beta (B.1.351)            | K417N, E484K, N501Y | A701V                |
|                     | Gamma (P.1/ P.1.1/ P.1.2) | K417T, E484K, N501Y | T1027I, V1176F       |
|                     | Epsilon (B.1.427/429)     | L452R               | /                    |
|                     | Eta (B.1.525)             | E484K               | F888L                |
|                     | Iota (B.1.526)            | S477N, E484K        | A701V                |
|                     | Kappa (B.1.617.1)         | L452R, E484Q        | Q1071H               |
|                     | 1.617.3                   | L452R, E484Q        | D950N                |
|                     | Mu (B.1.621, B.1.621.1)   | R346K, E484K, N501Y | D950N                |
|                     | Zeta (P.2)                | E484K               | V1176F               |

B

Top View

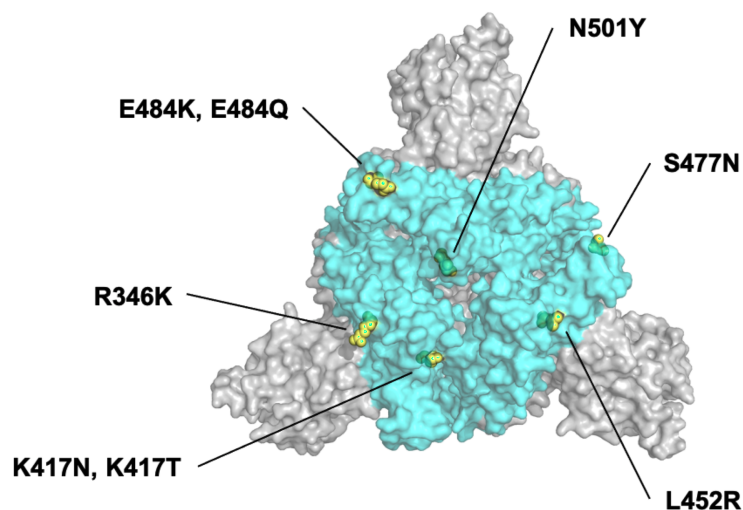

Side View

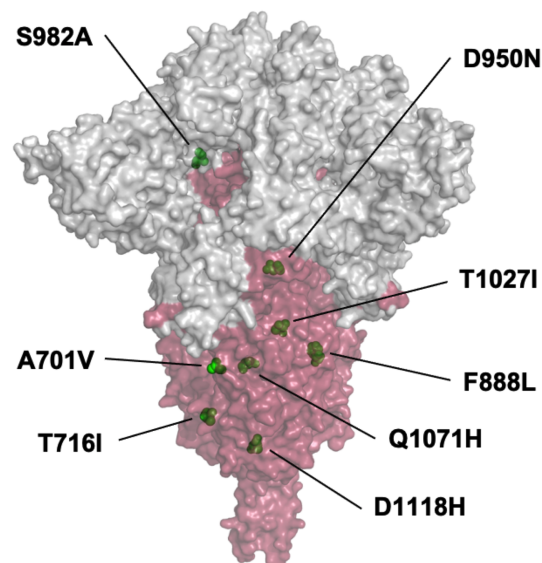

Fig 5

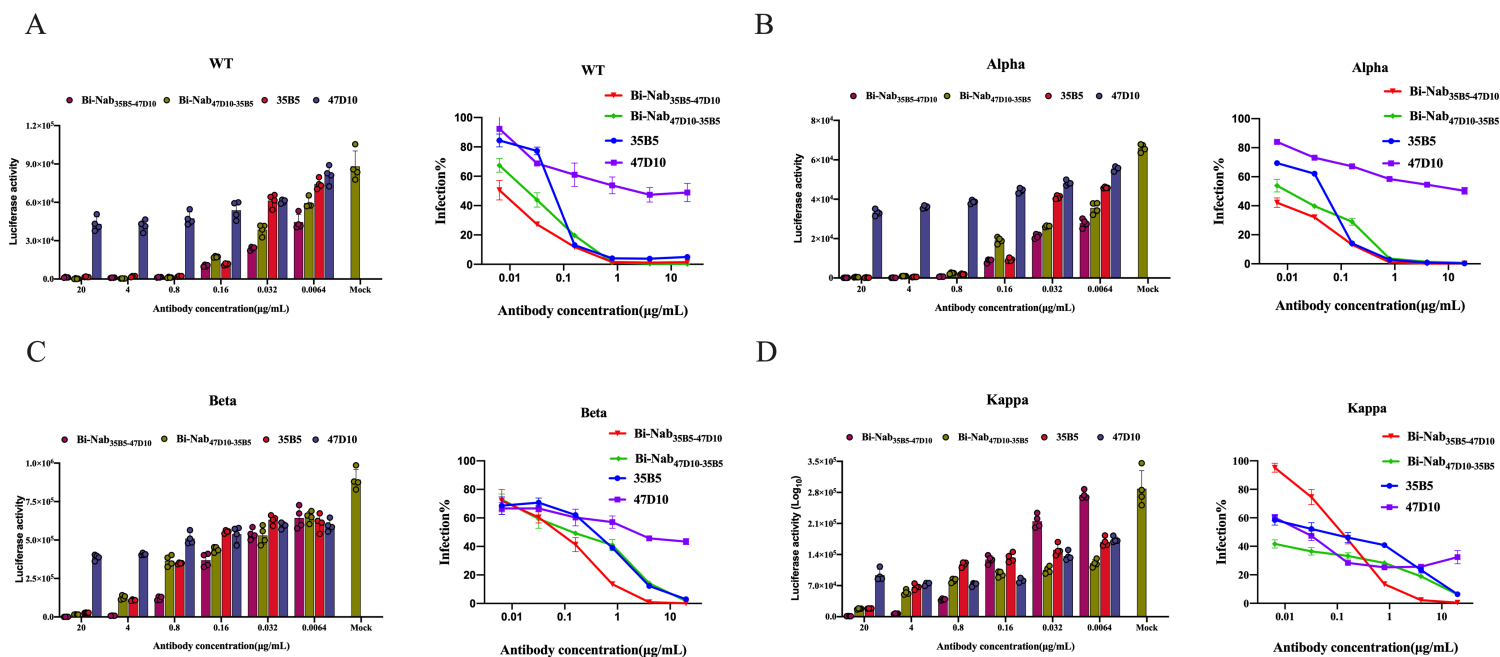

|                     | Bi-Nab <sub>35B5-47D10</sub> |                  |                | Bi-Nab <sub>47D10-35B5</sub> |                  |                | 35B5     |                  | 47D10          |          |                  |                       |
|---------------------|------------------------------|------------------|----------------|------------------------------|------------------|----------------|----------|------------------|----------------|----------|------------------|-----------------------|
| <b>Virus Strain</b> | %Breadth                     | IC <sub>50</sub> | Titers (ng/ml) | %Breadth                     | IC <sub>50</sub> | Titers (ng/ml) | %Breadth | IC <sub>50</sub> | Titers (ng/ml) | %Breadth | IC <sub>50</sub> | Titers (ng/ml)        |
| WT                  | 98.6                         |                  | 8.2            | 99.7                         |                  | 21.4           | 98.2     |                  | 48.0           | 52.6     |                  | 2.1 × 10 <sup>3</sup> |
| Alpha               | 99.8                         |                  | 6.9            | 99.4                         |                  | 14.9           | 99.7     |                  | 34.5           | 49.7     |                  | 5.3 × 10 <sup>3</sup> |
| Beta                | 99.9                         |                  | 64.5           | 98.3                         |                  | 140.5          | 96.9     |                  | 358.7          | 56.6     |                  | 2.4 × 10 <sup>3</sup> |
| Kappa               | 99.6                         |                  | 11.7           | 93.8                         |                  | 9.3            | 93.6     |                  | 71.1           | 74.4     |                  | 26.2                  |

Fig 6

A

| SARS-CoV-2 variants |                                     | Mutations in RBD                                                                                                             | Mutations in S2                          |
|---------------------|-------------------------------------|------------------------------------------------------------------------------------------------------------------------------|------------------------------------------|
| VOC                 | Delta (B.1.617.2)                   | L452R, T478K                                                                                                                 | D950N                                    |
|                     | Delta plus (AY.1, AY.2, AY.3)       | K417N, L452R, T478K                                                                                                          | D950N                                    |
|                     | Omicron (B.1.1.529 and BA lineages) | G339D, S371F, S373P, S375F, T376A, D405N, R408S, K417N, N440K, G446S, S477N, T478K, E484A, Q493R, G496S, Q498R, N501Y, Y505H | N764K, D796Y, N856K, Q954H, N969K, L981F |

B

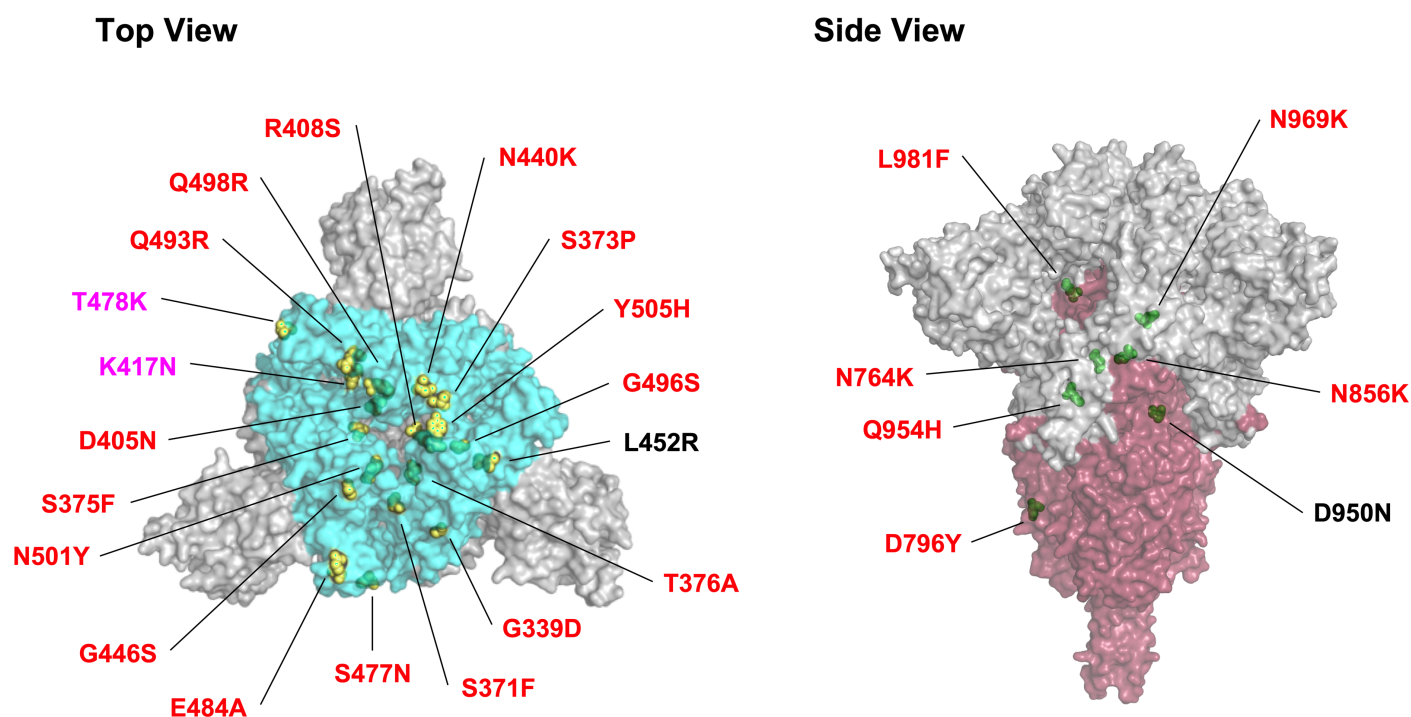

A

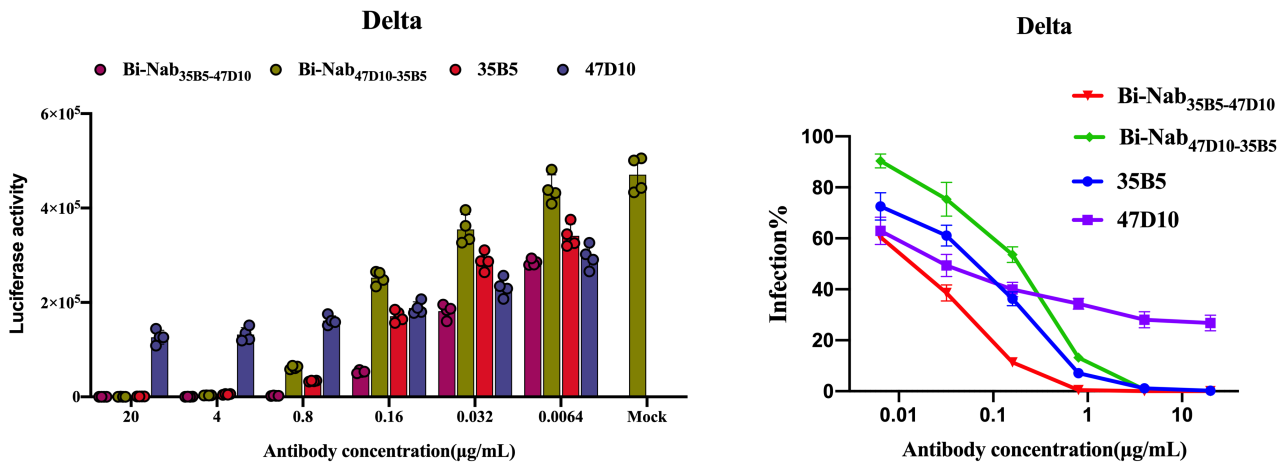

B

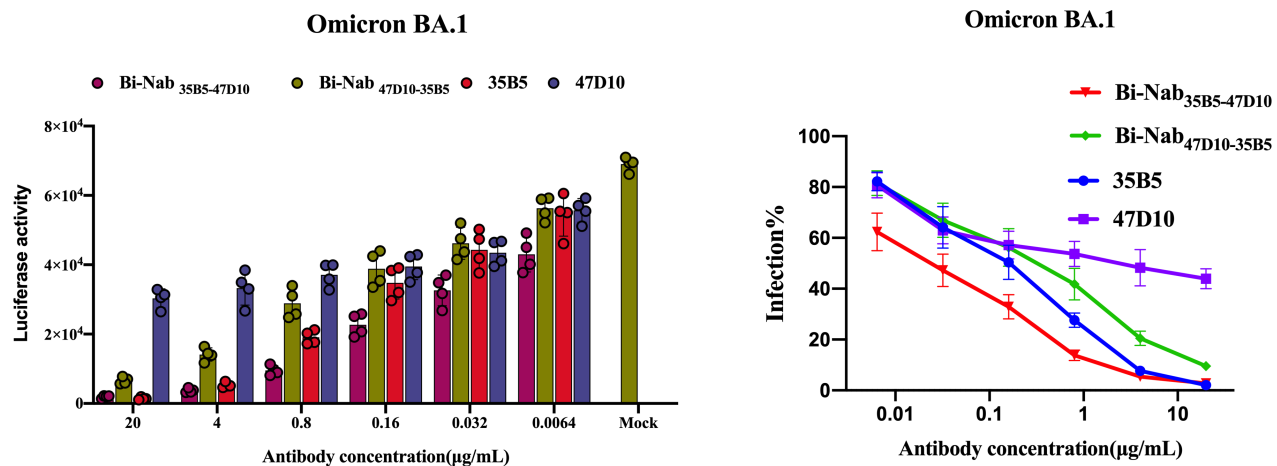

C

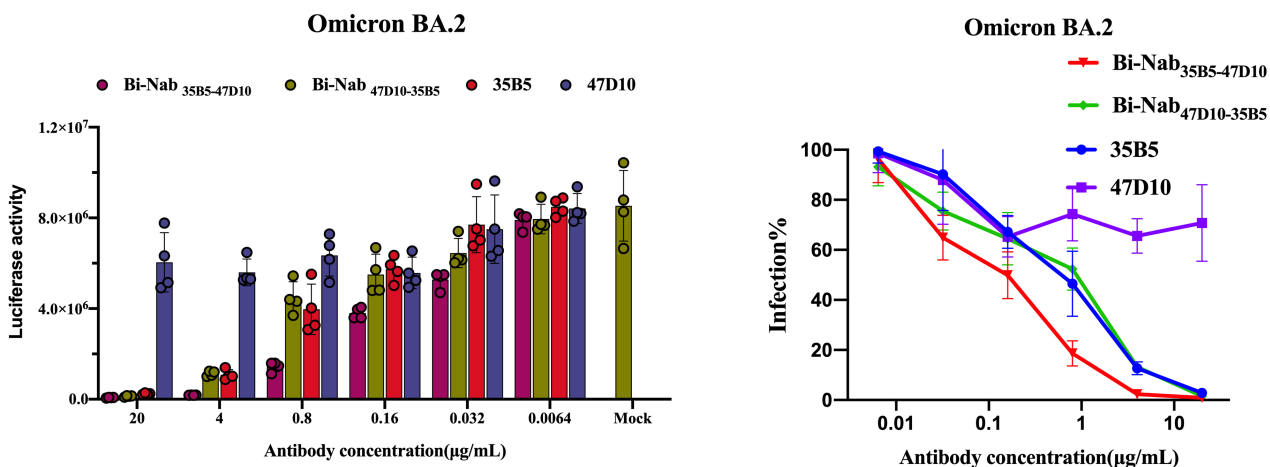

D

|                     | Bi-Nab <sub>35B5-47D10</sub> |                                 | Bi-Nab <sub>47D10-35B5</sub> |                                 | 35B5     |                                 | 47D10    |                                 |
|---------------------|------------------------------|---------------------------------|------------------------------|---------------------------------|----------|---------------------------------|----------|---------------------------------|
| <b>Virus Strain</b> | %Breadth                     | IC <sub>50</sub> Titers (ng/ml) | %Breadth                     | IC <sub>50</sub> Titers (ng/ml) | %Breadth | IC <sub>50</sub> Titers (ng/ml) | %Breadth | IC <sub>50</sub> Titers (ng/ml) |
| Delta               | 100                          | 14.3                            | 100                          | 146.1                           | 99.8     | 54.9                            | 73.1     | 45.2                            |
| Omicron BA.1        | 97.2                         | 27.6                            | 90.4                         | 273.7                           | 98       | 127.5                           | 56.1     | 1661.0                          |
| Omicron BA.2        | 99.2                         | 121.1                           | 98.4                         | 519.2                           | 97.2     | 516.8                           | 29.2     | 2.7 × 10 <sup>4</sup>           |
